# Supplementary material for: Effects of Grazing Indigenous Laying Hens on Soil Properties: Benefits and Challenges to Achieving Soil Fertility
Source: MDPI journal article supplement (doi:10.3390/su14063407), 2022-03-14
Supplement: s1 [file s1]

# Supplementary Materials

**Table S1.** Pearson’s correlation coefficient (*r*) and related significance between physical, chemical, and biological parameters at farm A (*p*-value < 0.05\*; *p*-value < 0.001\*\*;  
*p*-value < 0.0001\*\*\*).

|                                 | TN      | NH <sub>4</sub> <sup>+</sup> -N | NO <sub>3</sub> <sup>-</sup> -N | SOC    | P <sub>2</sub> O <sub>5</sub> | K <sub>2</sub> O | Cu      | Zn     | Fe      | Mn       | pH     | K <sup>+</sup> | Na <sup>+</sup> | Ca <sup>2+</sup> | Mg <sup>2+</sup> | Elect. Cond. | Bulk Density | Soil Moisture | Total Aerobic Bacteria | N-Fixing Bacteria | Denitrifying Bacteria | Fungi |
|---------------------------------|---------|---------------------------------|---------------------------------|--------|-------------------------------|------------------|---------|--------|---------|----------|--------|----------------|-----------------|------------------|------------------|--------------|--------------|---------------|------------------------|-------------------|-----------------------|-------|
| TN                              | *       |                                 |                                 |        |                               |                  |         |        |         |          |        |                |                 |                  |                  |              |              |               |                        |                   |                       |       |
| NH <sub>4</sub> <sup>+</sup> -N | 0.841*  | *                               |                                 |        |                               |                  |         |        |         |          |        |                |                 |                  |                  |              |              |               |                        |                   |                       |       |
| NO <sub>3</sub> <sup>-</sup> -N | 0.774*  | 0.890*                          | *                               |        |                               |                  |         |        |         |          |        |                |                 |                  |                  |              |              |               |                        |                   |                       |       |
| SOC                             | 0.578   | 0.139                           | 0.265                           | *      |                               |                  |         |        |         |          |        |                |                 |                  |                  |              |              |               |                        |                   |                       |       |
| P <sub>2</sub> O <sub>5</sub>   | 0.911** | 0.768*                          | 0.736*                          | 0.574  | *                             |                  |         |        |         |          |        |                |                 |                  |                  |              |              |               |                        |                   |                       |       |
| K <sub>2</sub> O                | 0.925** | 0.854*                          | 0.809*                          | 0.532  | 0.976**                       | *                |         |        |         |          |        |                |                 |                  |                  |              |              |               |                        |                   |                       |       |
| Cu                              | 0.627   | 0.355                           | 0.449                           | 0.608  | 0.792*                        | 0.668*           | *       |        |         |          |        |                |                 |                  |                  |              |              |               |                        |                   |                       |       |
| Zn                              | 0.666   | 0.534                           | 0.597                           | 0.413  | 0.856*                        | 0.763*           | 0.946** | *      |         |          |        |                |                 |                  |                  |              |              |               |                        |                   |                       |       |
| Fe                              | 0.178   | -0.127                          | -0.412                          | 0.322  | 0.051                         | 0.034            | -0.134  | -0.268 | *       |          |        |                |                 |                  |                  |              |              |               |                        |                   |                       |       |
| Mn                              | 0.626   | 0.295                           | 0.036                           | 0.472  | 0.513                         | 0.473            | 0.265   | 0.199  | 0.849*  | *        |        |                |                 |                  |                  |              |              |               |                        |                   |                       |       |
| pH                              | 0.463   | 0.202                           | 0.349                           | 0.884* | 0.564                         | 0.562            | 0.545   | 0.414  | 0.064   | 0.187    | *      |                |                 |                  |                  |              |              |               |                        |                   |                       |       |
| K <sup>+</sup>                  | 0.935** | 0.837*                          | 0.809*                          | 0.568  | 0.984***                      | 0.998***         | 0.710*  | 0.790* | 0.026   | 0.475    | 0.581  | *              |                 |                  |                  |              |              |               |                        |                   |                       |       |
| Na <sup>+</sup>                 | 0.431   | 0.565                           | 0.845*                          | 0.261  | 0.513                         | 0.568            | 0.447   | 0.555  | -0.731* | -0.395   | 0.481  | 0.577          | *               |                  |                  |              |              |               |                        |                   |                       |       |
| Ca <sup>2+</sup>                | 0.689*  | 0.645                           | 0.800*                          | 0.597  | 0.716*                        | 0.732*           | 0.664   | 0.650  | -0.367  | -0.004   | 0.731* | 0.753*         | 0.819*          | *                |                  |              |              |               |                        |                   |                       |       |
| Mg <sup>2+</sup>                | 0.845*  | 0.673*                          | 0.810*                          | 0.673* | 0.888*                        | 0.870*           | 0.832*  | 0.846* | -0.221  | 0.242    | 0.669* | 0.897*         | 0.746*          | 0.875*           | *                |              |              |               |                        |                   |                       |       |
| Elect. Cond.                    | 0.738*  | 0.888*                          | 0.995***                        | 0.213  | 0.715*                        | 0.789*           | 0.449   | 0.609  | -0.476  | -0.030   | 0.326  | 0.787*         | 0.867*          | 0.803*           | 0.798*           | *            |              |               |                        |                   |                       |       |
| Bulk Density                    | 0.027   | 0.263                           | 0.034                           | -0.295 | -0.263                        | -0.087           | -0.658  | -0.570 | 0.114   | -0.039   | -0.145 | -0.116         | -0.074          | -0.005           | -0.208           | 0.059        | *            |               |                        |                   |                       |       |
| Soil Moisture                   | -0.089  | -0.303                          | -0.629                          | -0.046 | -0.212                        | -0.242           | -0.439  | -0.522 | 0.939*  | 0.737    | -0.373 | -0.259         | -0.903*         | -0.665           | -0.571           | -0.679       | 0.141        | *             |                        |                   |                       |       |
| Total Aerobic Bacteria          | 0.726   | 0.522                           | 0.212                           | 0.715  | 0.614                         | 0.610            | 0.202   | 0.174  | 0.768   | 0.955*   | 0.453  | 0.597          | -0.218          | 0.165            | 0.301            | 0.149        | 0.061        | 0.606         | *                      |                   |                       |       |
| N-Fixing Bacteria               | 0.538   | 0.265                           | -0.035                          | 0.596  | 0.410                         | 0.388            | 0.048   | -0.013 | 0.917*  | 0.998*** | 0.189  | 0.377          | -0.469          | -0.130           | 0.057            | -0.111       | -0.027       | 0.771         | 0.941*                 | *                 |                       |       |
| Denitrifying Bacteria           | 0.851*  | 0.840*                          | 0.635                           | 0.826* | 0.928*                        | 0.937*           | 0.680   | 0.705  | 0.192   | 0.511    | 0.928* | 0.927*         | 0.385           | 0.734            | 0.747            | 0.621        | -0.010       | -0.037        | 0.692                  | 0.477             | *                     |       |
| Fungi                           | -0.082  | -0.292                          | -0.613                          | -0.057 | -0.230                        | -0.252           | -0.477  | -0.556 | 0.932*  | 0.734    | -0.391 | -0.269         | -0.893*         | -0.664           | -0.572           | -0.664       | 0.177        | 0.997***      | 0.606                  | 0.767             | -0.060                | *     |

**Table S2.** Pearson’s correlation coefficient (*r*) and related significance between physical, chemical, and biological parameters at farm B (*p*-value < 0.05\*; *p*-value < 0.001\*\*; *p*-value < 0.0001\*\*\*).

|                                 | TN     | NH <sub>4</sub> <sup>+</sup> -N | NO <sub>3</sub> <sup>-</sup> -N | SOC     | P <sub>2</sub> O <sub>5</sub> | K <sub>2</sub> O | Cu     | Zn     | Fe      | Mn      | pH      | K <sup>+</sup> | Na <sup>+</sup> | Ca <sup>2+</sup> | Mg <sup>2+</sup> | Elect. Cond. | Bulk Density | Soil Moisture | Total Aerobic Bacteria | N-Fixing Bacteria | Denitrifying Bacteria | Fungi |
|---------------------------------|--------|---------------------------------|---------------------------------|---------|-------------------------------|------------------|--------|--------|---------|---------|---------|----------------|-----------------|------------------|------------------|--------------|--------------|---------------|------------------------|-------------------|-----------------------|-------|
| TN                              | *      |                                 |                                 |         |                               |                  |        |        |         |         |         |                |                 |                  |                  |              |              |               |                        |                   |                       |       |
| NH <sub>4</sub> <sup>+</sup> -N | 0.641  | *                               |                                 |         |                               |                  |        |        |         |         |         |                |                 |                  |                  |              |              |               |                        |                   |                       |       |
| NO <sub>3</sub> <sup>-</sup> -N | 0.801* | 0.764*                          | *                               |         |                               |                  |        |        |         |         |         |                |                 |                  |                  |              |              |               |                        |                   |                       |       |
| SOC                             | 0.725* | 0.223                           | 0.205                           | *       |                               |                  |        |        |         |         |         |                |                 |                  |                  |              |              |               |                        |                   |                       |       |
| P <sub>2</sub> O <sub>5</sub>   | 0.622  | 0.183                           | 0.490                           | 0.513   | *                             |                  |        |        |         |         |         |                |                 |                  |                  |              |              |               |                        |                   |                       |       |
| K <sub>2</sub> O                | 0.800* | 0.372                           | 0.700                           | 0.534   | 0.299                         | *                |        |        |         |         |         |                |                 |                  |                  |              |              |               |                        |                   |                       |       |
| Cu                              | -0.022 | 0.212                           | -0.155                          | 0.099   | -0.429                        | 0.106            | *      |        |         |         |         |                |                 |                  |                  |              |              |               |                        |                   |                       |       |
| Zn                              | 0.699  | 0.680                           | 0.424                           | 0.704   | 0.208                         | 0.529            | 0.594  | *      |         |         |         |                |                 |                  |                  |              |              |               |                        |                   |                       |       |
| Fe                              | -0.126 | 0.343                           | -0.103                          | -0.140  | -0.748*                       | 0.030            | 0.843* | 0.437  | *       |         |         |                |                 |                  |                  |              |              |               |                        |                   |                       |       |
| Mn                              | -0.393 | 0.100                           | -0.270                          | -0.417  | -0.890*                       | -0.134           | 0.729* | 0.098  | 0.934** | *       |         |                |                 |                  |                  |              |              |               |                        |                   |                       |       |
| pH                              | 0.461  | -0.227                          | 0.010                           | 0.751*  | 0.474                         | 0.551            | 0.212  | 0.405  | -0.227  | -0.352  | *       |                |                 |                  |                  |              |              |               |                        |                   |                       |       |
| K <sup>+</sup>                  | 0.893* | 0.767*                          | 0.952**                         | 0.409   | 0.525                         | 0.731*           | -0.095 | 0.594  | -0.077  | -0.317  | 0.122   | *              |                 |                  |                  |              |              |               |                        |                   |                       |       |
| Na <sup>+</sup>                 | 0.784* | 0.519                           | 0.911*                          | 0.301   | 0.704                         | 0.650            | -0.478 | 0.240  | -0.476  | -0.618  | 0.127   | 0.894*         | *               |                  |                  |              |              |               |                        |                   |                       |       |
| Ca <sup>2+</sup>                | 0.876* | 0.285                           | 0.592                           | 0.790*  | 0.857*                        | 0.660            | -0.263 | 0.490  | -0.515  | -0.741* | 0.652   | 0.714*         | 0.762*          | *                |                  |              |              |               |                        |                   |                       |       |
| Mg <sup>2+</sup>                | 0.611  | -0.039                          | 0.121                           | 0.933** | 0.490                         | 0.597            | -0.036 | 0.490  | -0.291  | -0.493  | 0.849*  | 0.294          | 0.297           | 0.770*           | *                |              |              |               |                        |                   |                       |       |
| Elect. Cond.                    | 0.716* | 0.655                           | 0.971***                        | 0.064   | 0.402                         | 0.713*           | -0.161 | 0.277  | -0.092  | -0.188  | -0.006  | 0.873*         | 0.868*          | 0.497            | 0.027            | *            |              |               |                        |                   |                       |       |
| Bulk Density                    | 0.352  | 0.869                           | 0.835                           | -0.452  | -0.306                        | 0.227            | -0.034 | 0.268  | 0.912   | 0.809   | -0.759  | 0.787          | 0.803           | -0.305           | -0.628           | 0.856        | *            |               |                        |                   |                       |       |
| Soil Moisture                   | -0.247 | 0.420                           | 0.360                           | -0.789  | -0.802                        | -0.304           | -0.503 | -0.341 | 0.690   | 0.895   | -0.976* | 0.289          | 0.311           | -0.787           | -0.784           | 0.399        | 0.813        | *             |                        |                   |                       |       |
| Total Aerobic Bacteria          | -0.126 | 0.394                           | 0.333                           | -0.503  | -0.732                        | -0.059           | -0.675 | -0.314 | 0.486   | 0.653   | -0.808  | 0.239          | 0.351           | -0.617           | -0.467           | 0.357        | 0.760        | 0.915         | *                      |                   |                       |       |
| N-Fixing Bacteria               | -0.274 | 0.401                           | 0.341                           | -0.812  | -0.814                        | -0.338           | -0.498 | -0.360 | 0.689   | 0.905   | -0.984* | 0.272          | 0.287           | -0.806           | -0.804           | 0.381        | 0.800        | 0.999**       | 0.901                  | *                 |                       |       |
| Denitrifying Bacteria           | -0.450 | -0.456                          | -0.497                          | 0.054   | -0.543                        | -0.144           | -0.934 | -0.664 | -0.511  | -0.218  | -0.084  | -0.581         | -0.392          | -0.329           | 0.309            | -0.499       | -0.156       | 0.218         | 0.502                  | 0.206             | *                     |       |
| Fungi                           | 0.056  | -0.477                          | -0.463                          | 0.770   | 0.266                         | 0.364            | -0.345 | -0.095 | -0.842  | -0.861  | 0.683   | -0.489         | -0.315          | 0.464            | 0.921            | -0.502       | -0.583       | -0.544        | -0.181                 | -0.564            | 0.655                 | *     |
